# Supplementary material for: Genetic Divergence and Connectivity among Gene Pools of Polyprion americanus
Source: MDPI journal article supplement (doi:10.3390/ani13020302), 2023-01-15
Supplement: s1 [file s1]

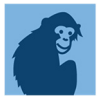

Article

# Genetic Divergence and Connectivity among Gene Pools of *Polyprion americanus*

Pablo Presa, Alfonso Pita, Nedia R. Matusse and Montse Pérez

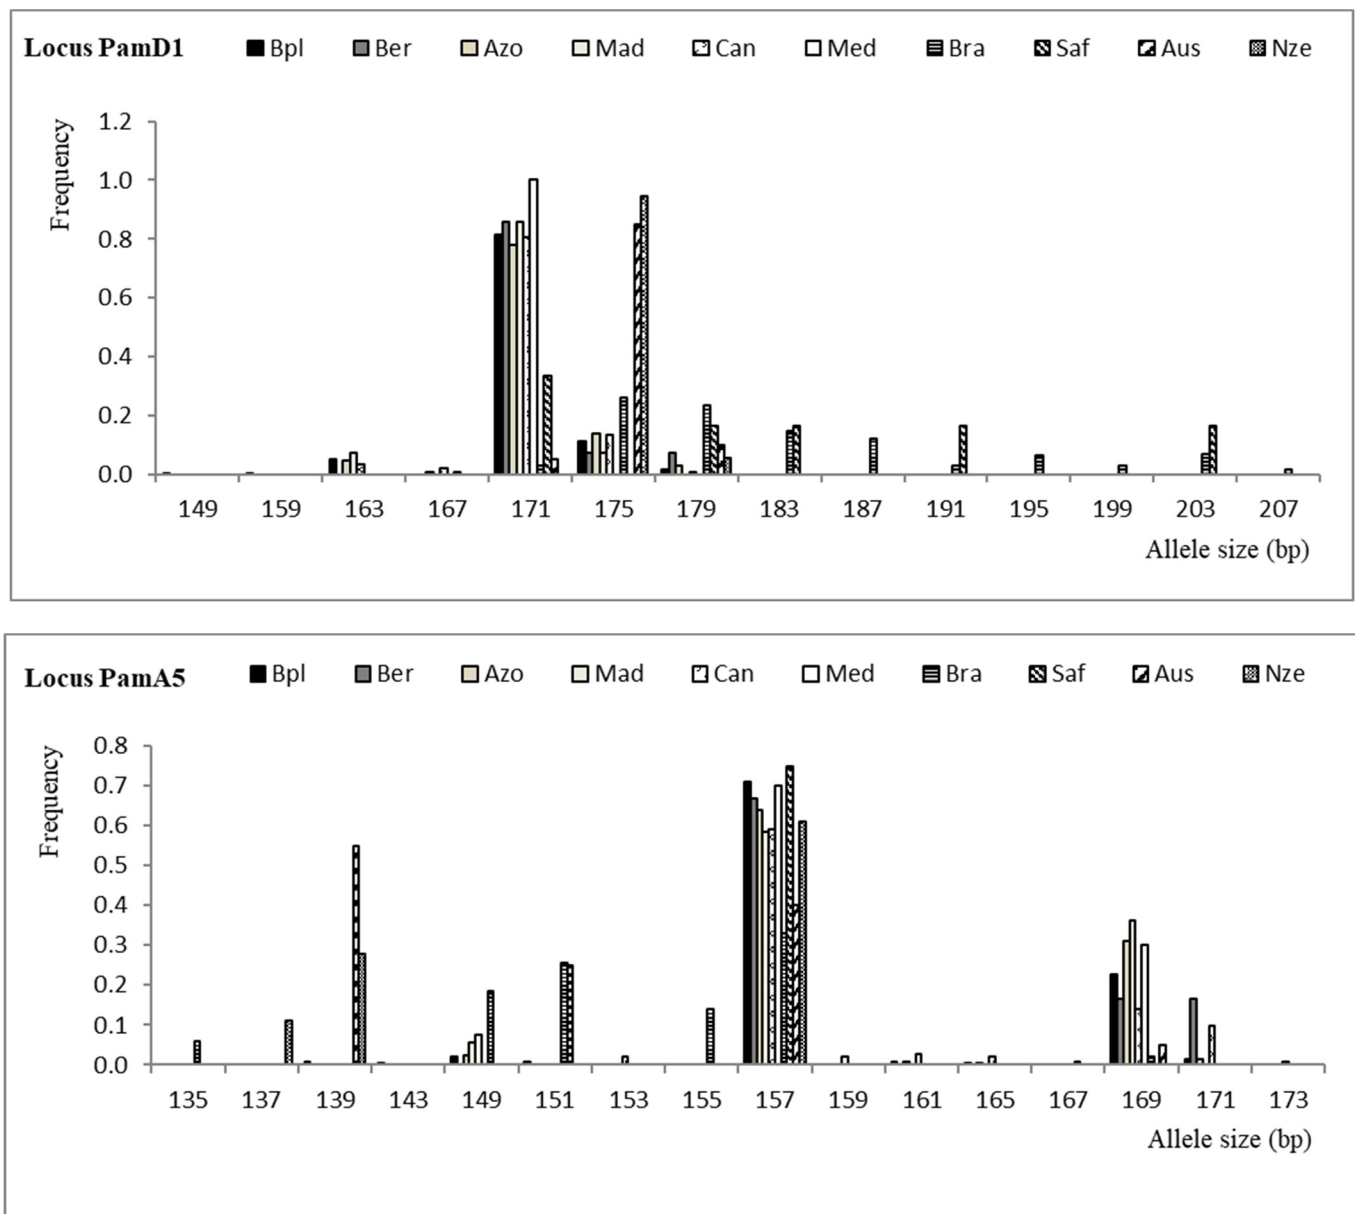

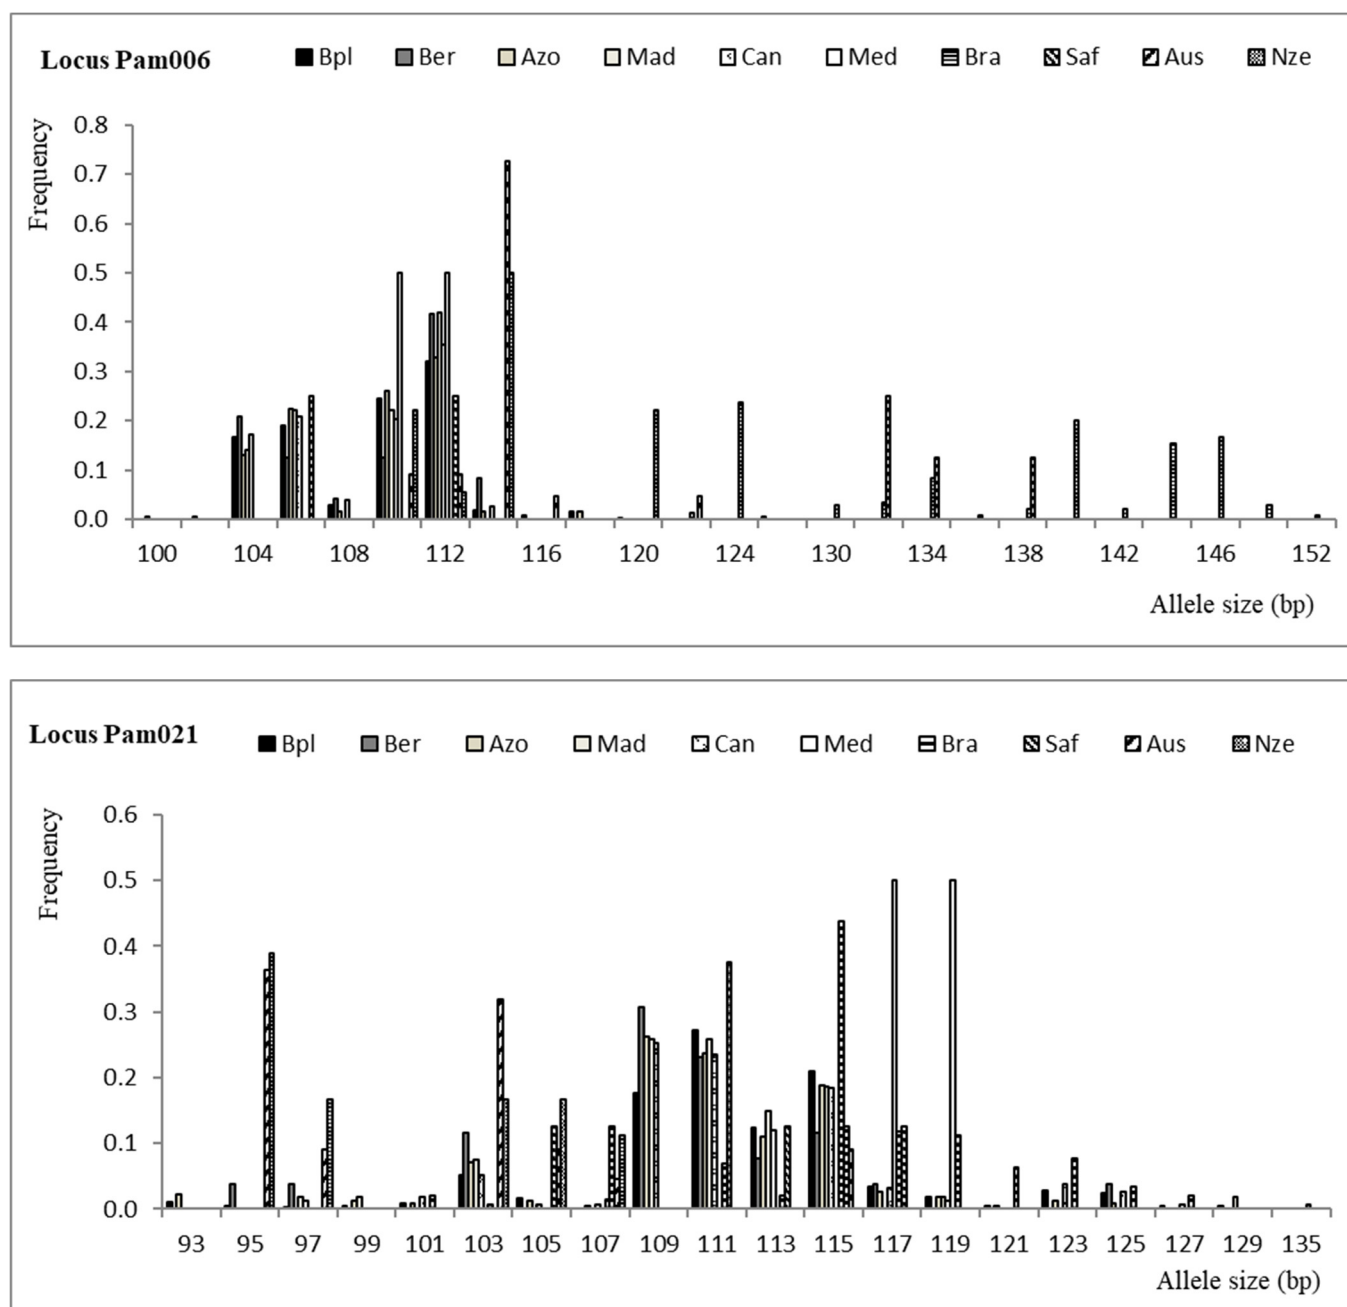

**Figure S1.** Distribution of allele frequencies (in bp) of four microsatellites in *Polyprion americanus* as broken per sampling region (sample codes in Table 1).

**Table S1.** Genetic parameters of four microsatellites in ten sampling areas of *Polyprion americanus* (sample codes in Table 1).

|        |                 | Bpl     | Ber     | Azo     | Mad     | Can     | Med                  | Bra     | Saf         | Aus     | Nze                 |
|--------|-----------------|---------|---------|---------|---------|---------|----------------------|---------|-------------|---------|---------------------|
| PamD1  | N               | 140     | 7       | 123     | 21      | 74      | 4                    | 71      | 6           | 10      | 9                   |
|        | A               | 6       | 3       | 5       | 3       | 5       | 1                    | 11      | 5           | 3       | 2                   |
|        | Modal A         | 171     | 171     | 171     | 171     | 171     | 171                  | 175–179 | 171         | 175     | 175                 |
|        | Range A         | 149–179 | 171–179 | 163–179 | 163–175 | 163–179 | 171                  | 167–207 | 171–203     | 171–179 | 175–179             |
|        | R <sub>s</sub>  | 1.322   | 1.275   | 1.370   | 1.261   | 1.336   | 1.000                | 1.836   | 1.279       | 1.111   | 1.543               |
|        | H <sub>E</sub>  | 0.322   | 0.274   | 0.371   | 0.265   | 0.337   | 0.000                | 0.837   | 0.850       | 0.289   | 0.111               |
|        | H <sub>O</sub>  | 0.271   | 0.286   | 0.293   | 0.095   | 0.230   | 0.000                | 0.704   | 0.833       | 0.100   | 0.111               |
|        | F <sub>IS</sub> | 0.158   | −0.043  | 0.210*  | 0.641   | 0.318   | NA                   | 0.159   | 0.020       | 0.654   | 0.000 <sup>NA</sup> |
|        | Null            | 0.052   | 0.000   | 0.074   | 0.171   | 0.089   | 0.001                | 0.064   | 0.000       | 0.172   | 0.000               |
| PamA5  | N               | 141     | 6       | 118     | 18      | 72      | 5                    | 68      | 4           | 10      | 9                   |
|        | A               | 9       | 3       | 6       | 3       | 9       | 2                    | 7       | 2           | 3       | 3                   |
|        | Modal A         | 157     | 157     | 157     | 157     | 157     | 157                  | 157     | 157         | 139     | 157                 |
|        | Range A         | 139–171 | 157–171 | 149–171 | 149–169 | 149–173 | 157–169              | 135–169 | 151–157     | 139–169 | 137–157             |
|        | R <sub>s</sub>  | 1.446   | 1.545   | 1.496   | 1.541   | 1.619   | 1.467                | 1.773   | 1.429       | 1.563   | 1.569               |
|        | H <sub>E</sub>  | 0.446   | 0.567   | 0.496   | 0.539   | 0.620   | 0.450                | 0.774   | 0.417       | 0.561   | 0.556               |
|        | H <sub>O</sub>  | 0.411   | 0.333   | 0.432   | 0.611   | 0.444   | 0.600                | 0.603   | 0.500       | 0.600   | 0.778               |
|        | F <sub>IS</sub> | 0.078*  | 0.412   | 0.129*  | −0.133  | 0.284*  | −0.333               | 0.221   | −0.200      | −0.069  | −0.400              |
|        | Null            | 0.074   | 0.143   | 0.071   | 0.044   | 0.115   | 0.000                | 0.092   | 0.000       | 0.000   | 0.000               |
| Pam006 | N               | 190     | 12      | 123     | 25      | 79      | 2                    | 72      | 4           | 11      | 9                   |
|        | A               | 10      | 6       | 9       | 4       | 6       | 2                    | 13      | 5           | 5       | 4                   |
|        | Modal A         | 112     | 112     | 112     | 112     | 112     | 110–112              | 124–140 | 106–112–132 | 114     | 114                 |
|        | Range A         | 104–126 | 104–114 | 100–118 | 104–112 | 104–114 | 110–112              | 122–152 | 106–138     | 110–122 | 110–120             |
|        | R <sub>s</sub>  | 1.774   | 1.775   | 1.759   | 1.722   | 1.763   | 1.667                | 1.848   | 1.893       | 1.472   | 1.686               |
|        | H <sub>E</sub>  | 0.774   | 0.780   | 0.759   | 0.726   | 0.763   | 1.000                | 0.849   | 0.875       | 0.473   | 0.694               |
|        | H <sub>O</sub>  | 0.753   | 0.667   | 0.707   | 0.520   | 0.747   | 0.000                | 0.681   | 1.000       | 0.455   | 0.557               |
|        | F <sub>IS</sub> | 0.028   | 0.146   | 0.069   | 0.284   | 0.022   | 1.000                | 0.198*  | −0.143      | 0.038   | 0.200               |
|        | Null            | 0.015   | 0.054   | 0.016   | 0.108   | 0.006   | 0.333                | 0.086   | 0.000       | 0.000   | 0.037               |
| Pam021 | N               | 191     | 13      | 114     | 27      | 79      | 1                    | 72      | 4           | 11      | 9                   |
|        | A               | 18      | 9       | 15      | 9       | 14      | 2                    | 13      | 6           | 6       | 5                   |
|        | Modal A         | 111     | 109–111 | 109–111 | 109–111 | 109–111 | 117–119              | 115     | 111         | 95–103  | 95                  |
|        | Range A         | 93–129  | 95–125  | 93–125  | 97–129  | 97–127  | 117–119              | 101–135 | 105–117     | 95–115  | 95–107              |
|        | R <sub>s</sub>  | 1.832   | 1.846   | 1.824   | 1.818   | 1.832   | 2.000                | 1.770   | 1.893       | 1.775   | 1.797               |
|        | H <sub>E</sub>  | 0.832   | 0.856   | 0.824   | 0.818   | 0.832   | NA                   | 0.771   | 0.917       | 0.782   | 0.799               |
|        | H <sub>O</sub>  | 0.744   | 0.615   | 0.763   | 0.815   | 0.734   | 1.000                | 0.625   | 0.750       | 0.636   | 0.778               |
|        | F <sub>IS</sub> | 0.107*  | 0.281   | 0.074   | 0.003   | 0.118   | −1.000 <sup>NA</sup> | 0.190*  | 0.182       | 0.186   | 0.026               |
|        | Null            | 0.039   | 0.101   | 0.030   | 0.000   | 0.047   | 0.000                | 0.033   | 0.000       | 0.110   | 0.000               |

**Note:** For each locus and sample is given: number of individuals (N), number of alleles (A), modal allele size (Modal A), allele range (Range A, in bp), allelic richness (R<sub>s</sub>), expected heterozygosity (H<sub>E</sub>), observed heterozygosity (H<sub>O</sub>), fixation index F<sub>IS</sub> [83]. Significant departures from Hardy-Weinberg equilibrium were corrected with sequential test of Bonferroni (\*  $p \leq 0.01$ ) [84] and null allele frequencies (Null).

**Table S2.** Migration rate  $M$  ( $\pm$  95% CI) between wreckfish samples (codes in Table 1) from the first row (Donors) to those in the first column (Receptors) as inferred with BayesAss. Bolded figures indicate migration rates significantly different from zero. M-values on diagonal cells correspond to within-sample migration rates.

|     | Bpl                               | Ber               | Azo                               | Mad               | Can               | Med               | Bra               | Saf               | Aus                               | Nze               |
|-----|-----------------------------------|-------------------|-----------------------------------|-------------------|-------------------|-------------------|-------------------|-------------------|-----------------------------------|-------------------|
| Bpl | 0.850 $\pm$ 0.092                 | 0.002 $\pm$ 0.003 | <b>0.124<math>\pm</math>0.101</b> | 0.002 $\pm$ 0.003 | 0.013 $\pm$ 0.021 | 0.002 $\pm$ 0.003 | 0.002 $\pm$ 0.003 | 0.002 $\pm$ 0.003 | 0.002 $\pm$ 0.004                 | 0.002 $\pm$ 0.003 |
| Ber | 0.096 $\pm$ 0.091                 | 0.682 $\pm$ 0.028 | 0.066 $\pm$ 0.085                 | 0.015 $\pm$ 0.028 | 0.067 $\pm$ 0.081 | 0.015 $\pm$ 0.027 | 0.015 $\pm$ 0.028 | 0.015 $\pm$ 0.028 | 0.015 $\pm$ 0.028                 | 0.015 $\pm$ 0.027 |
| Azo | <b>0.258<math>\pm</math>0.045</b> | 0.003 $\pm$ 0.005 | 0.714 $\pm$ 0.048                 | 0.002 $\pm$ 0.005 | 0.011 $\pm$ 0.016 | 0.002 $\pm$ 0.005 | 0.002 $\pm$ 0.004 | 0.003 $\pm$ 0.005 | 0.003 $\pm$ 0.005                 | 0.002 $\pm$ 0.005 |
| Mad | <b>0.182<math>\pm</math>0.089</b> | 0.009 $\pm$ 0.017 | 0.072 $\pm$ 0.085                 | 0.675 $\pm$ 0.017 | 0.017 $\pm$ 0.029 | 0.009 $\pm$ 0.016 | 0.009 $\pm$ 0.016 | 0.009 $\pm$ 0.016 | 0.010 $\pm$ 0.019                 | 0.009 $\pm$ 0.017 |
| Can | <b>0.153<math>\pm</math>0.093</b> | 0.004 $\pm$ 0.008 | 0.091 $\pm$ 0.097                 | 0.004 $\pm$ 0.008 | 0.729 $\pm$ 0.053 | 0.004 $\pm$ 0.007 | 0.004 $\pm$ 0.007 | 0.004 $\pm$ 0.008 | 0.004 $\pm$ 0.008                 | 0.004 $\pm$ 0.008 |
| Med | <b>0.101<math>\pm</math>0.091</b> | 0.021 $\pm$ 0.039 | 0.048 $\pm$ 0.074                 | 0.021 $\pm$ 0.039 | 0.032 $\pm$ 0.055 | 0.689 $\pm$ 0.041 | 0.023 $\pm$ 0.042 | 0.022 $\pm$ 0.040 | 0.021 $\pm$ 0.039                 | 0.021 $\pm$ 0.038 |
| Bra | 0.011 $\pm$ 0.015                 | 0.004 $\pm$ 0.008 | 0.008 $\pm$ 0.013                 | 0.004 $\pm$ 0.008 | 0.004 $\pm$ 0.008 | 0.004 $\pm$ 0.008 | 0.952 $\pm$ 0.025 | 0.004 $\pm$ 0.008 | 0.005 $\pm$ 0.009                 | 0.004 $\pm$ 0.007 |
| Saf | 0.041 $\pm$ 0.061                 | 0.025 $\pm$ 0.047 | 0.033 $\pm$ 0.056                 | 0.024 $\pm$ 0.044 | 0.039 $\pm$ 0.063 | 0.023 $\pm$ 0.042 | 0.077 $\pm$ 0.073 | 0.692 $\pm$ 0.046 | 0.023 $\pm$ 0.043                 | 0.023 $\pm$ 0.042 |
| Aus | 0.019 $\pm$ 0.033                 | 0.015 $\pm$ 0.028 | 0.023 $\pm$ 0.041                 | 0.015 $\pm$ 0.028 | 0.016 $\pm$ 0.031 | 0.015 $\pm$ 0.029 | 0.018 $\pm$ 0.033 | 0.015 $\pm$ 0.027 | 0.849 $\pm$ 0.073                 | 0.015 $\pm$ 0.029 |
| Nze | 0.018 $\pm$ 0.033                 | 0.018 $\pm$ 0.033 | 0.018 $\pm$ 0.033                 | 0.018 $\pm$ 0.032 | 0.018 $\pm$ 0.033 | 0.018 $\pm$ 0.033 | 0.018 $\pm$ 0.032 | 0.018 $\pm$ 0.033 | <b>0.174<math>\pm</math>0.070</b> | 0.685 $\pm$ 0.034 |

**Table S3.** Migration rate M ( $\pm 95\%$  CI) between wreckfish samples (codes in Table 1) from the first row (Donors) to those in the first column (Receptors) as inferred with BIMr. Bolded figures indicate migration rates significantly different from zero. M-values on the diagonal correspond to within-sample migration rates.

|     | Bpl                     | Ber                               | Azo                               | Mad                               | Can                               | Med                     | Bra                     | Saf                     | Aus                     | Nze                     |
|-----|-------------------------|-----------------------------------|-----------------------------------|-----------------------------------|-----------------------------------|-------------------------|-------------------------|-------------------------|-------------------------|-------------------------|
| Bpl | 0.062 $\pm$ 0.198       | <b>0.200<math>\pm</math>0.128</b> | <b>0.186<math>\pm</math>0.171</b> | <b>0.243<math>\pm</math>0.104</b> | <b>0.182<math>\pm</math>0.132</b> | 0.112 $\pm$ 0.115       | 0.003 $\pm$ 0.005       | 0.004 $\pm$ 0.009       | 0.004 $\pm$ 0.007       | 0.004 $\pm$ 0.007       |
| Ber | 5.84E-11 $\pm$ 8.39E-10 | 1.000 $\pm$ 1.58E-6               | 5.84E-11 $\pm$ 8.74E-10           | 5.78E-11 $\pm$ 8.48E-10           | 5.87E-11 $\pm$ 8.57E-10           | 5.81E-11 $\pm$ 8.35E-10 | 5.91E-11 $\pm$ 9.00E-10 | 5.91E-11 $\pm$ 8.81E-10 | 5.76E-11 $\pm$ 8.40E-10 | 5.98E-11 $\pm$ 9.09E-10 |
| Azo | 0.041 $\pm$ 0.134       | <b>0.159<math>\pm</math>0.147</b> | 0.261 $\pm$ 0.238                 | <b>0.283<math>\pm</math>0.142</b> | <b>0.155<math>\pm</math>0.117</b> | 0.082 $\pm$ 0.106       | 0.003 $\pm$ 0.007       | 0.006 $\pm$ 0.012       | 0.005 $\pm$ 0.009       | 0.005 $\pm$ 0.010       |
| Mad | 1.82E-10 $\pm$ 1.19E-9  | 1.81E-10 $\pm$ 1.18E-9            | 1.81E-10 $\pm$ 1.17E-9            | 1.000 $\pm$ 2.21E-6               | 1.76E-10 $\pm$ 1.14E-9            | 1.80E-10 $\pm$ 1.17E-9  | 1.80E-10 $\pm$ 1.17E-9  | 1.80E-10 $\pm$ 1.16E-9  | 1.80E-10 $\pm$ 1.17E-9  | 1.81E-10 $\pm$ 1.18E-9  |
| Can | 2.96E-10 $\pm$ 3.48E-9  | 2.96E-10 $\pm$ 3.42E-9            | 2.86E-10 $\pm$ 3.24E-9            | 2.92E-10 $\pm$ 3.33E-9            | 1.000 $\pm$ error                 | 2.93E-10 $\pm$ 3.39E-9  | 2.90E-10 $\pm$ 3.37E-9  | 2.99E-10 $\pm$ 3.54E-9  | 3.01E-10 $\pm$ 3.59E-9  | 2.98E-10 $\pm$ 3.49E-9  |
| Med | 1.59E-10 $\pm$ 2.80E-10 | 1.59E-10 $\pm$ 2.80E-10           | 1.60E-10 $\pm$ 2.81E-10           | 1.59E-10 $\pm$ 2.79E-10           | 1.60E-10 $\pm$ 2.81E-10           | 1.000 $\pm$ 4.55E-6     | 1.60E-10 $\pm$ 2.80E-10 | 1.60E-10 $\pm$ 2.81E-10 | 1.59E-10 $\pm$ 2.79E-10 | 1.60E-10 $\pm$ 2.80E-10 |
| Bra | 3.22E-10 $\pm$ 2.86E-9  | 3.21E-10 $\pm$ 2.88E-9            | 3.16E-10 $\pm$ 2.84E-9            | 3.20E-10 $\pm$ 2.83E-9            | 3.15E-10 $\pm$ 2.80E-9            | 3.21E-10 $\pm$ 2.87E-9  | 1.000 $\pm$ 2.63E-6     | 3.20E-10 $\pm$ 2.87E-9  | 3.14E-10 $\pm$ 2.82E-9  | 3.17E-10 $\pm$ 2.82E-9  |
| Saf | 9.65E-11 $\pm$ 5.22E-10 | 9.51E-11 $\pm$ 5.10E-10           | 9.54E-11 $\pm$ 5.12E-10           | 9.63E-11 $\pm$ 5.19E-10           | 9.67E-11 $\pm$ 5.22E-10           | 9.68E-11 $\pm$ 5.24E-10 | 9.72E-11 $\pm$ 5.27E-10 | 1.000 $\pm$ 2.71E-6     | 9.68E-11 $\pm$ 5.20E-10 | 9.60E-11 $\pm$ 5.12E-10 |
| Aus | 6.80E-11 $\pm$ 3.30E-10 | 6.74E-11 $\pm$ 3.22E-10           | 6.70E-11 $\pm$ 3.13E-10           | 6.72E-11 $\pm$ 3.18E-10           | 6.76E-11 $\pm$ 3.23E-10           | 6.74E-11 $\pm$ 3.18E-10 | 6.78E-11 $\pm$ 3.24E-10 | 6.74E-11 $\pm$ 3.20E-10 | 1.000 $\pm$ 2.59E-6     | 6.74E-11 $\pm$ 3.18E-10 |
| Nze | 2.25E-10 $\pm$ 1.75E-9  | 2.28E-10 $\pm$ 1.83E-9            | 2.23E-10 $\pm$ 1.72E-9            | 2.23E-10 $\pm$ 1.73E-9            | 2.23E-10 $\pm$ 1.75E-9            | 2.26E-10 $\pm$ 1.77E-9  | 2.24E-10 $\pm$ 1.76E-9  | 2.28E-10 $\pm$ 1.83E-9  | 2.25E-10 $\pm$ 1.76E-9  | 1.000 $\pm$ error       |
